# Supplementary material for: Interaction of Cd(ii) and Ni(ii) terpyridine complexes with model polynucleotides: a multidisciplinary approach
Source: Royal Society of Chemistry journal article supplement (doi:10.1039/c5ra24919h), 2016-01-01
Supplement: c5ra24919h4.pdf [file c5ra24919h4.pdf]

**Interaction of Cd(II) and Ni(II) terpyridine complexes with model polynucleotides:  
a multidisciplinary approach**

**Giampaolo Barone • Giuseppe Gennaro • Anna Maria Giuliani • Mauro Giustini**

G. Barone • G. Gennaro • A.M. Giuliani

Dipartimento STEBICEF, Università di Palermo, 90128 Palermo, Italia

M. Giustini (✉)

Dipartimento di Chimica, Università "La Sapienza", P.le A. Moro 5, 00185 Roma, Italia

Tel: +39 06 49913336

Fax: +39 06 490324

email: mauro.giustini@uniroma1.it

**Electronic Supplementary Information**

### ***S.1. Synthesis and characterization of cadmium and nickel complexes***

$\text{Cd}(\text{terpy})\text{Cl}_2$  (complex **1**) was prepared according to literature procedures<sup>1,2</sup> by reacting 0.98mmol of  $\text{CdCl}_2$  with equimolar terpyridine in water at 363K. A light yellow precipitate was obtained, separated, washed and dried: the yield was 80.9%. The product was very scarcely soluble in water, as expected for a neutral complex.

Elemental analysis. Calculated for  $\text{C}_{15}\text{H}_{11}\text{N}_3\text{Cl}_2\text{Cd}$  (**1**): C= 43.24%; H= 2.66%; N= 10.09%; experimental: C= 43.65%; H= 2.64%; N= 10.03%.

The nickel-terpyridine complex  $\text{Ni}(\text{terpy})\text{Cl}_2 \cdot 3\text{H}_2\text{O}$  (complex **2**) was prepared following literature procedures;<sup>3,4</sup> a slight excess of  $\text{NiCl}_2 \cdot 6\text{H}_2\text{O}$  was used to avoid formation of bis(terpyridine)complexes.<sup>3</sup> Complex **2** was synthesized in ethanol solution at 343K: a blue-green crystalline product was obtained with 65% yield. The complex is very soluble in water.

Elemental analysis. Calculated for  $\text{C}_{15}\text{H}_{17}\text{N}_3\text{O}_3\text{Cl}_2\text{Ni}$  (**2**): C= 43.21%; H= 4.11%; N= 10.08%; experimental: C= 43.10%; H= 4.34%; N= 10.06%.

## S.2. FT-IR spectra

The IR spectra (KBr pellets) of terpy, complex **1** and complex **2**, together with a Table of the most significant vibrations with the assignments, are presented in Fig S1 and Table S1. The assignments are based on literature data.<sup>5</sup>

The presence of shifted terpyridine bands in the IR spectra of **1** and **2** is a clear evidence of the metal complexation. The spectra of **2** exhibit also a broad intense OH stretching band centred at  $3250\text{cm}^{-1}$  (not shown), due to the three water molecules present in the complex. The most interesting metal-chlorine stretching bands are very neatly observed for the cadmium complex at  $269$  and  $253\text{cm}^{-1}$ , in agreement with the literature data.<sup>6</sup> Two medium intensity bands at  $256$  and  $246\text{cm}^{-1}$  can tentatively be assigned to Ni-Cl stretching vibrations for complex **2**.<sup>7</sup> With the aid of the IR data pertinent to Ir-N stretchings in the  $[\text{Ir}(\text{terpy})_2](\text{ClO}_4)_3 \cdot \text{H}_2\text{O}$  complex,<sup>5</sup> Ni-N stretchings were identified in the spectra of **2**. Indeed, on the basis of literature data for related complexes<sup>7</sup> the stretching frequencies for the Ni-N and Ir-N bonds should not be substantially different; moreover similar Ni-N stretching frequencies have been reported for other octahedral Ni(II) complexes.<sup>8</sup> The assignments for complex **1** were made accordingly, by analogy. In the case of  $\text{Cd}(\text{terpy})\text{Cl}_2$  only one band at  $309\text{cm}^{-1}$  was observed in the relevant IR spectral region, at a frequency nicely in between the values reported for octahedral and tetrahedral ammine complexes of  $\text{Cd}(\text{II})$ <sup>9</sup> while the other bands reported in the literature<sup>6</sup> were outside the available range.

| Terpy    | Complex <b>1</b> | Complex <b>2</b>     | Assignments       |
|----------|------------------|----------------------|-------------------|
| 1581 vs  | 1590 vs          | 1598 vs              | CC ring stretch   |
| 1265 m   | 1249 s, b        | 1253 m               | CCN ring stretch  |
| 989 m    | 1014 s           | 974 w<br>1017 m, s   | CC ring stretch   |
| 632 m    | 658 m            | 669 w                | CCN in plane def. |
| 622 m    | 650 m,s          | 649 m, w             |                   |
| 615 w    | 638 m,s          | 642 m                |                   |
| 510 m    | 511 m, w         | 511 w                |                   |
| 399 m, s | 399 m, w         | 442 w                |                   |
|          | 309 w            | 373 w,b, 324 w 304 w | Me-N stretch      |
|          | 269 m, 253m      | (256* m, 246* m)     | Me-Cl stretch     |

<sup>a)</sup> wavenumbers in  $\text{cm}^{-1}$  - \* tentative assignments

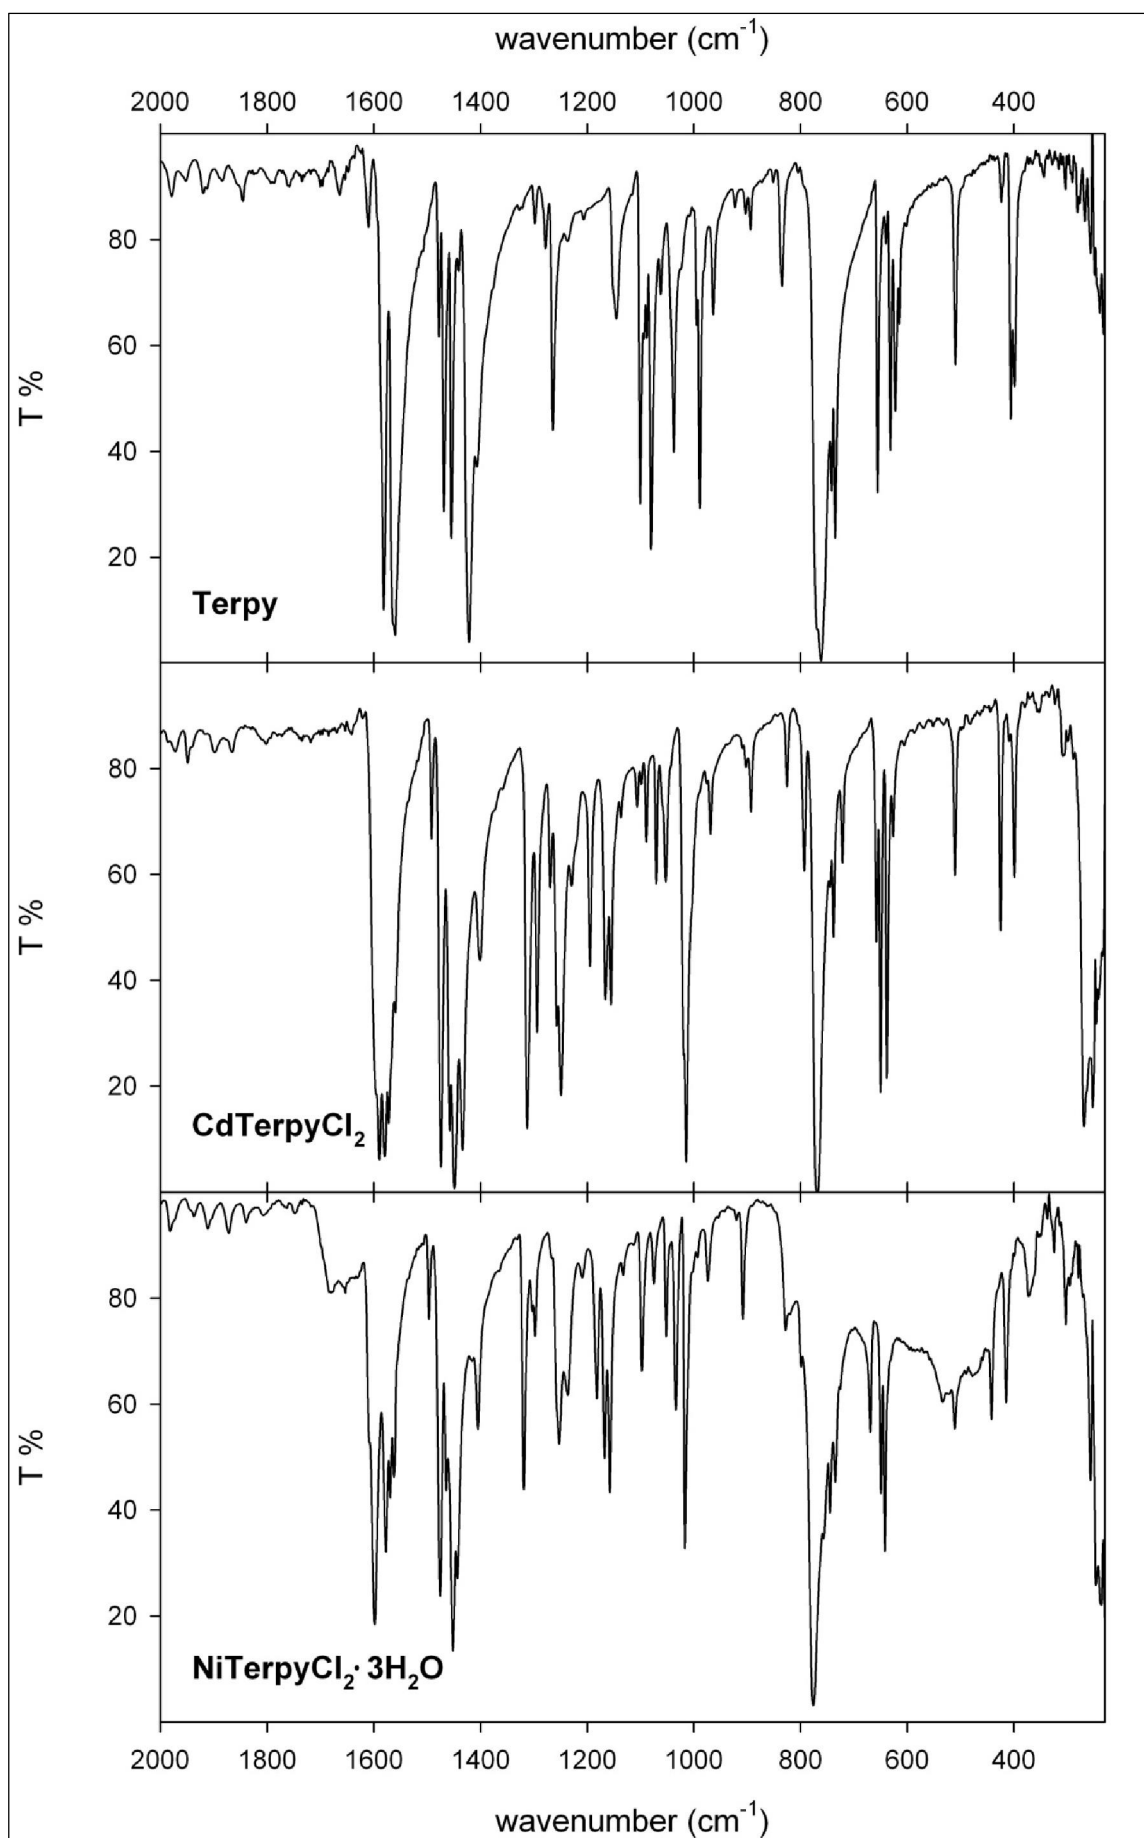

**Fig. S1** FT-IR spectra (KBr pellet) of the ligand and its metal complexes.

### S.3. Thermogravimetric analysis

The thermograms of the complexes **1** and **2** were obtained under N<sub>2</sub> flux in the temperature range 300-1170K, with an heating rate of either 5K/min (complex **1**) or 10K/min (for **2**); the relevant data are collected in Table S2. Complex **2** lost water in two steps, the first corresponding to hydration water (324 K, 1H<sub>2</sub>O) and the second to coordinated water (369K, 2H<sub>2</sub>O), confirming the analytical results and in agreement with the X-ray obtained formula:<sup>4</sup> thus the nickel complex prepared can be formulated as [Ni(terpy)(H<sub>2</sub>O)<sub>2</sub>Cl]Cl·H<sub>2</sub>O, as expected.

The thermogravimetric analysis yielded also an unexpected and previously not reported decomposition scheme for both **1** and **2**, involving as a first step the loss of metal chloride (either CdCl<sub>2</sub> at 688K for **1**, or ½ NiCl<sub>2</sub> at 729K for **2**). This step was followed by the progressive loss of terpy leaving no residue in the case of complex **1**. In the case of complex **2**, the first loss seemingly yielded the corresponding bis-terpyridine complex, that would loose the terpyridine ligand in the following step, leaving a residue of ½ NiCl<sub>2</sub>.

The percent weight losses for the nickel complex did not match exactly the calculated values, even though they were not dramatically different. The first stage of the thermal decomposition might possibly not involve the whole *mono*-terpyridine complex; this would also explain the percent weight of the residue, higher than expected for half NiCl<sub>2</sub>. The different behaviour of the two complexes after the first thermal loss is in agreement with the almost complete absence of any literature report of simple bis-terpyridine complexes of Cd(II).

**Table S2**  
Terpyridine and its complexes with cadmium and nickel: thermogravimetric results

| Compound                  | T, K              | Weight loss, % <sup>a)</sup> | Mass loss, Da <sup>a)</sup> |
|---------------------------|-------------------|------------------------------|-----------------------------|
| <b>1</b> M.W. 416.6Da     | 688               | 44.8 (44.0)                  | 186.8 (183.3)               |
|                           | 868               | 45.8 <sup>†</sup>            | 190.8 <sup>†</sup>          |
|                           | >920              | 8.9 <sup>‡</sup>             | 37.1 <sup>‡</sup>           |
|                           |                   | (56.0)                       | (233.3)                     |
| <b>2</b> M.W. 416.9Da     | 369               | 8.7 (8.6)                    | 36.2 (36.0)                 |
|                           | 729               | 14.5 (15.5)                  | 60.4 (64.8)                 |
|                           | 906               | 57.7 (56.0)                  | 240.5 (233.3)               |
|                           | residue at 1170K  | 19.1 (15.5)                  | 79.6 (64.8)                 |
| <b>Terpy</b> M.W. 233.3Da | 480 <sup>b)</sup> | 98.7                         | 230.3 (233.3)               |

<sup>a)</sup> in parentheses the losses calculated for the decomposition scheme outlined in the text.

<sup>b)</sup> Literature value for 5% loss: 498K.<sup>10</sup>

### S.4. Electronic spectra

The UV-Vis spectra of terpy (in ethanol, because of its poor solubility in water) and of complexes **1** and **2** (in aqueous solution) have been collected at room temperature in the region 200-350nm. In Table S3 the relevant spectral data are reported. The molar absorbance values for complex **2** compare reasonably well with the literature data reported for the bis[ $\alpha$ -terpyridine- $\omega$ -methylpoly(ethylene glycol)] Ni(II) hexafluorophosphate in water.<sup>11</sup>

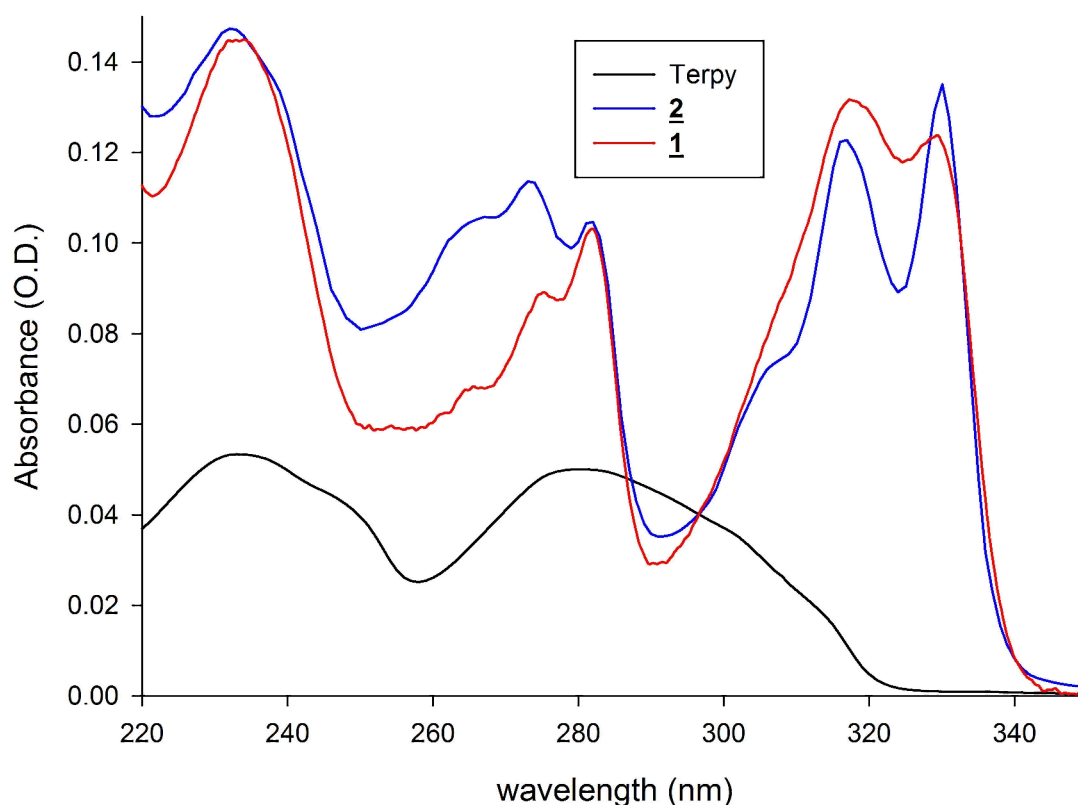

**Fig. S2** UV absorption spectra of terpyridine (2.5  $\mu$ M), complex **1** (7.1  $\mu$ M) and complex **2** (6.9  $\mu$ M).

| <b>Terpy</b><br>$\lambda$             | <b>Complex 1</b><br>$\lambda$ ( $\epsilon$ )                                     | <b>Complex 2</b><br>$\lambda$ ( $\epsilon$ )                                     |
|---------------------------------------|----------------------------------------------------------------------------------|----------------------------------------------------------------------------------|
| 233 (2.23 $\cdot 10^4$ ) <sup>§</sup> | 232 (2.13 $\cdot 10^4$ )                                                         | 233 (2.08 $\cdot 10^4$ )<br>274 (1.65 $\cdot 10^4$ )                             |
| 280 (2.09 $\cdot 10^4$ ) <sup>§</sup> | 282 (1.40 $\cdot 10^4$ )<br>319 (1.81 $\cdot 10^4$ )<br>330 (1.72 $\cdot 10^4$ ) | 282 (1.52 $\cdot 10^4$ )<br>319 (1.83 $\cdot 10^4$ )<br>330 (1.98 $\cdot 10^4$ ) |

<sup>§</sup>  $\epsilon$  values from ref. 12.

**S.5. Supplementary data of Circular dichroism and absorption spectroscopy**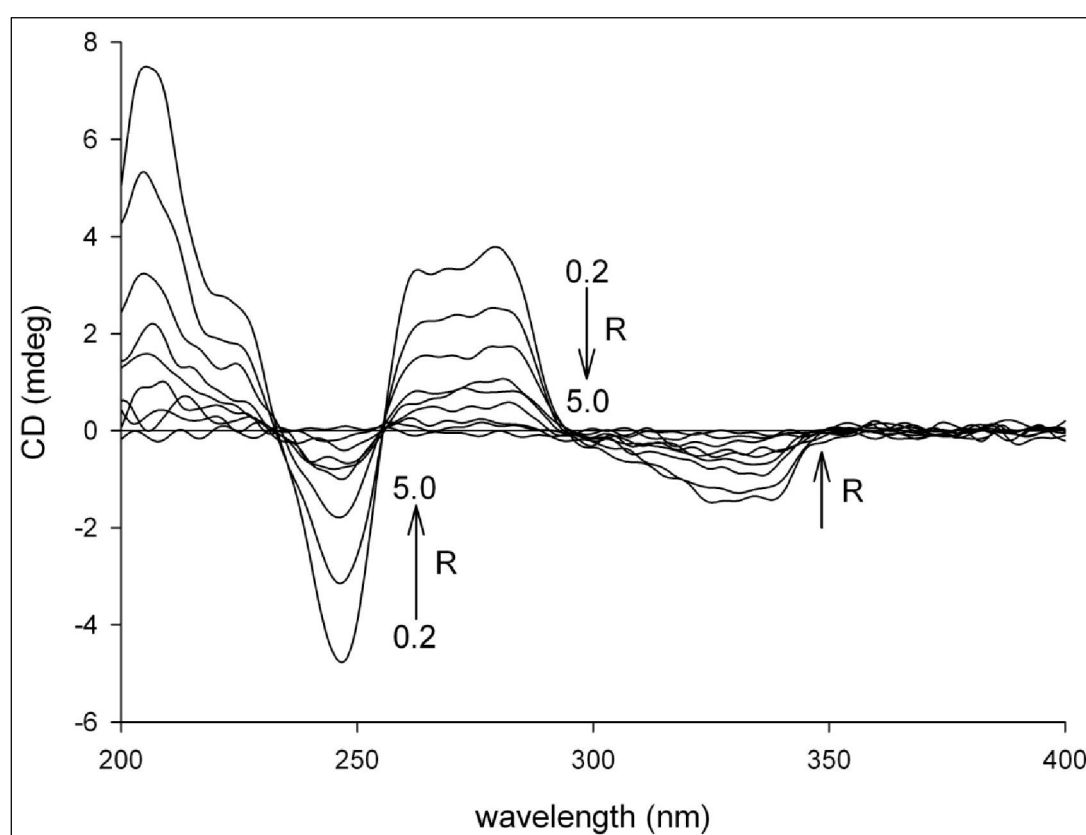

**Fig. S3** CD spectra of Cd(terpy)Cl<sub>2</sub> titrated with polyAT. [Cd(terpy)Cl<sub>2</sub>]= 6.25 μM; Tris 1.0 mM at pH 7.8 - NaCl 2 mM; l= 1.0 cm; T= 298 K.

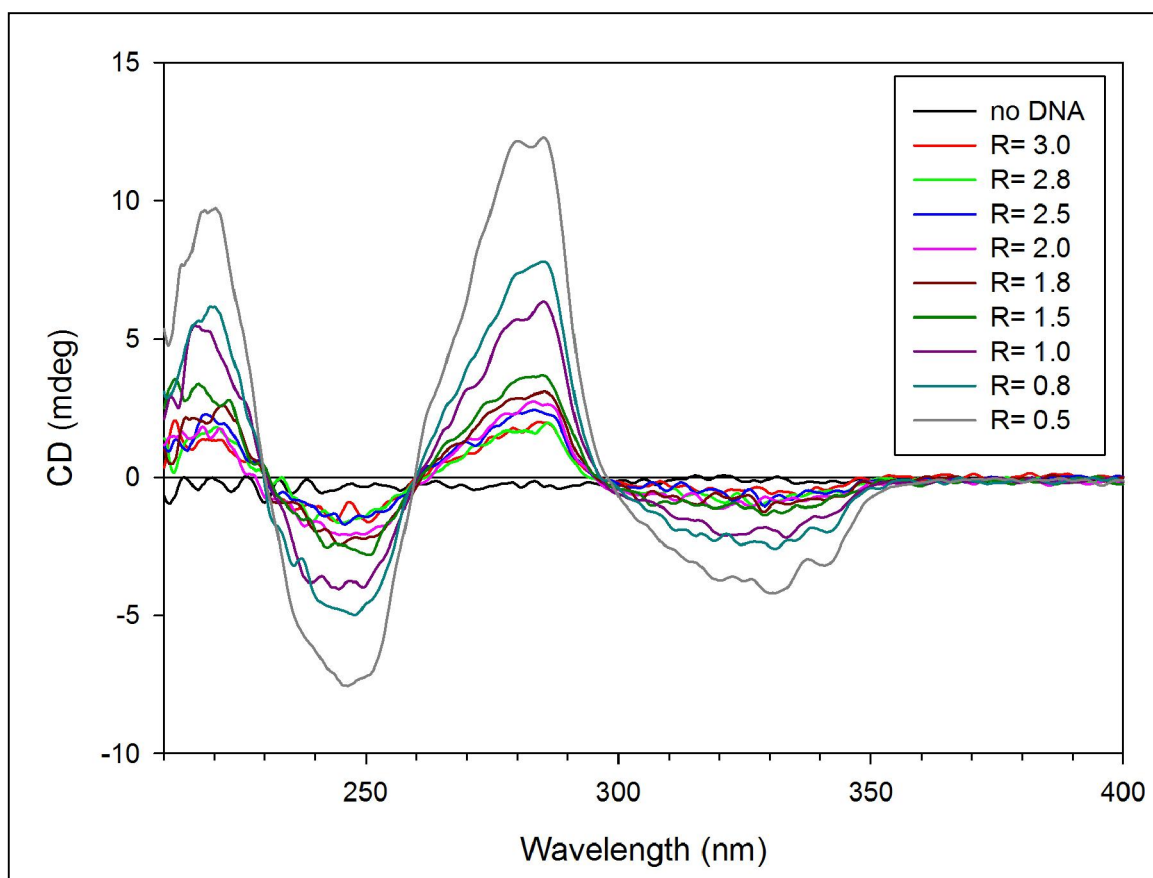

**Fig. S4** Titration of Cd(terpy)Cl<sub>2</sub> with ct-DNA. Lyophilized ct-DNA (dialyzed as described in the literature<sup>13</sup>) concentration has been obtained by UV spectroscopy ( $\epsilon_{260} = 6600 \text{ M}^{-1} \text{ cm}^{-1}$ ).<sup>14</sup>  
 $R = [\text{Cd(terpy)Cl}_2] / [\text{ct-DNA}]_P$ ;  $[\text{Cd(terpy)Cl}_2] = 6.25 \cdot 10^{-5} \text{ M}$  - Tris 1.0 mM at pH 7.5 - NaCl 2 mM;  $l = 1.0 \text{ cm}$ ;  $T = 298 \text{ K}$ .



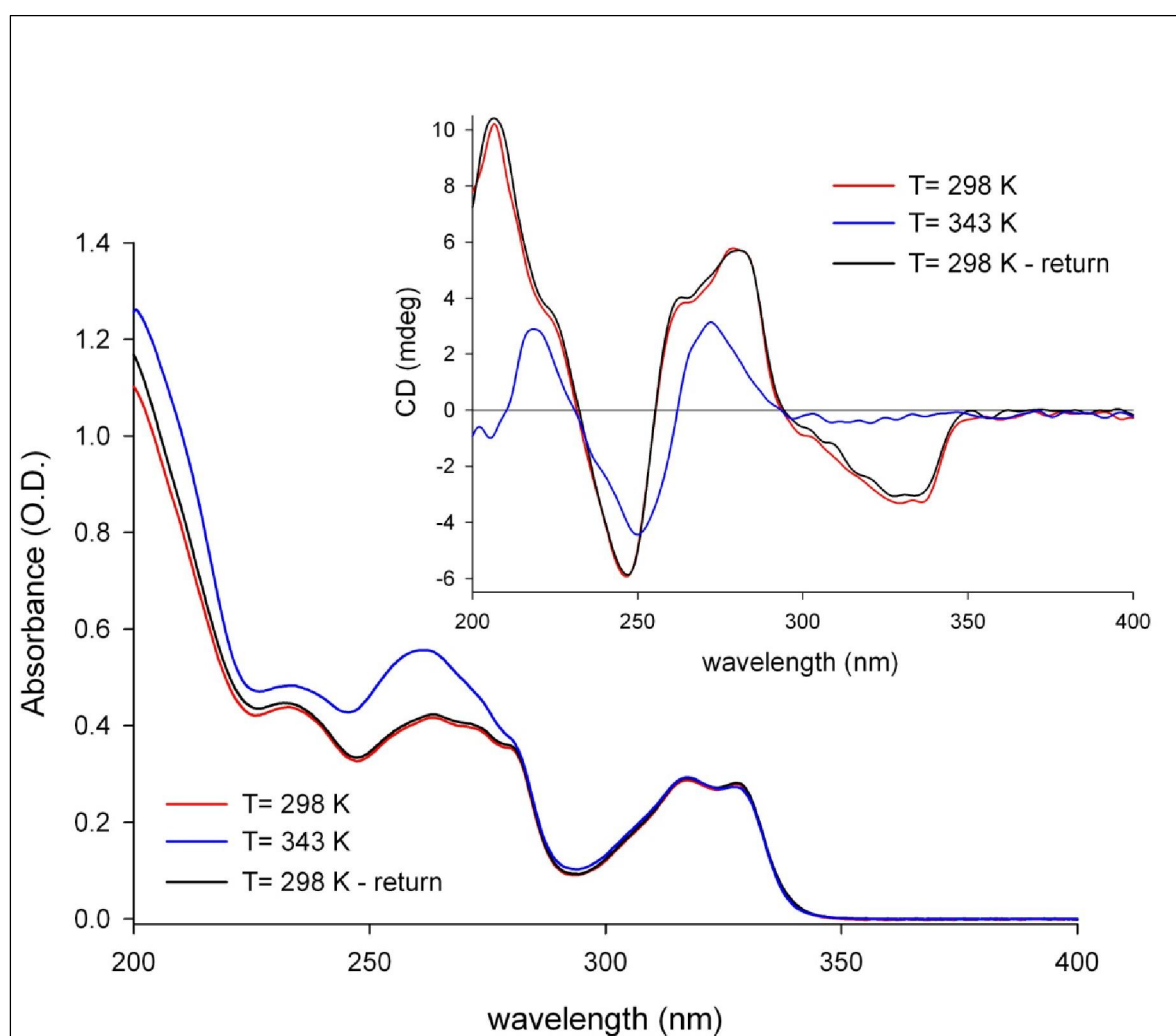

**Fig. S5** UV-Vis and CD (inset) spectra of the system Cd(terpy)Cl<sub>2</sub>/polyAT (R= 0.5).

[polyAT]<sub>p</sub>= 41.3 μM; Tris 1.0 mM at pH 7.3 - NaCl 2 mM; l= 1.0 cm.

**S.6. PolyAT melting in the presence of 1.**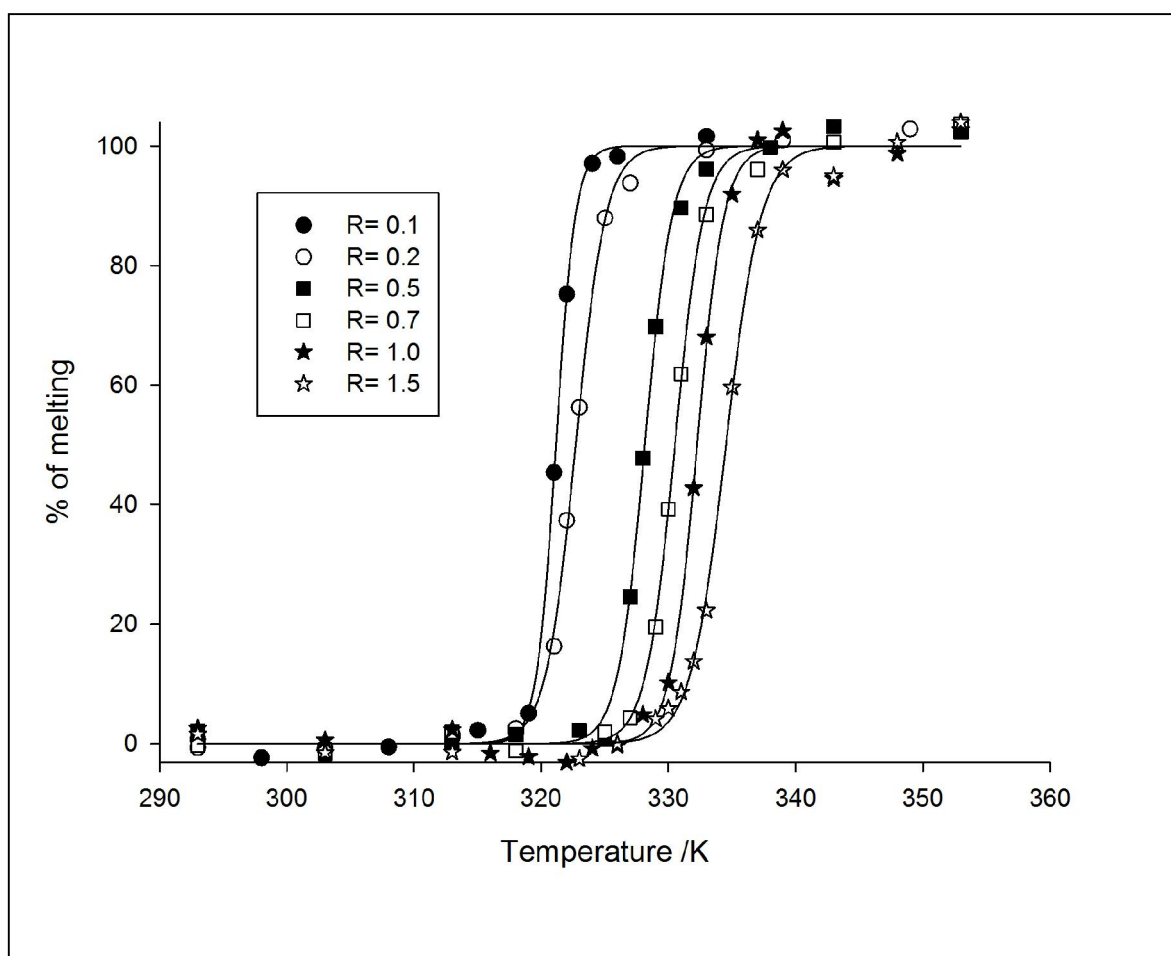

**Fig. S6** Normalized melting profiles for the polyAT-Cd(terpy)Cl<sub>2</sub> system in 1 mM Tris-10 mM NaCl (pH= 7.5±0.3).

### S.7. Supplementary data of fluorescence spectroscopy

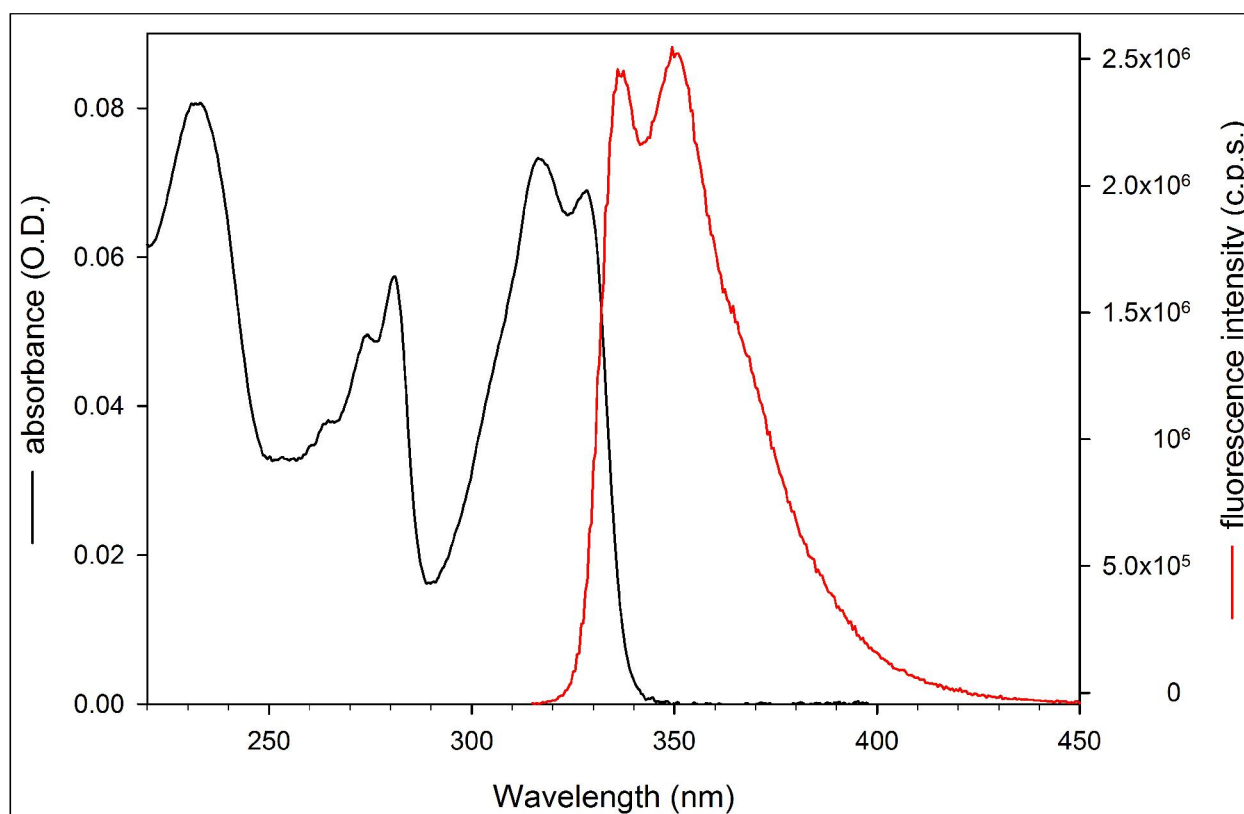

**Fig. S7** UV-vis (left hand axis) and emission (right hand axis) spectra of a 3.8 μM solution of Cd(terpy)Cl<sub>2</sub> in Tris 1.0 mM at pH 7.5 - NaCl 2 mM; l = 1.0 cm; T = 298 K; λ<sub>exc</sub> = 280 nm; slits: 1.5/1.5 nm.

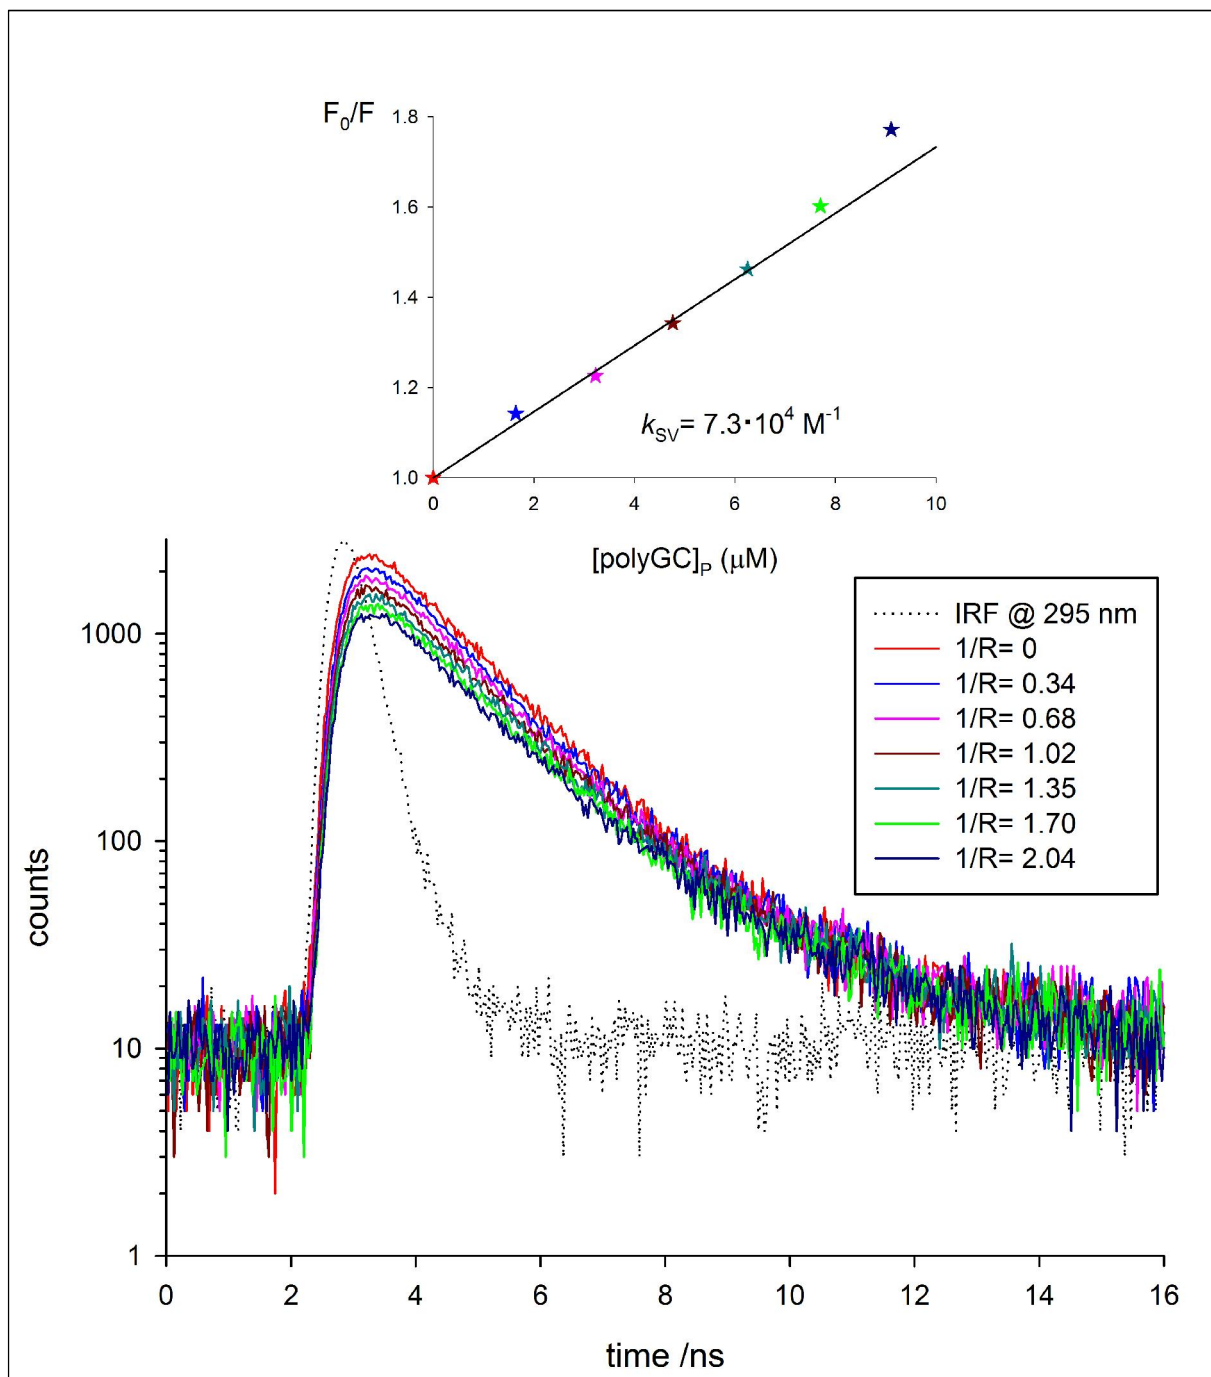

**Fig. S8** Fluorescence lifetime measurements (TCSPC) for  $\text{Cd}(\text{terpy})\text{Cl}_2$  solution titrated with polyGC.  $R = [\text{Cd}(\text{terpy})\text{Cl}_2]/[\text{polyGC}]_P$ ;  $[\text{Cd}(\text{terpy})\text{Cl}_2] = 4.3 \mu\text{M}$  in Tris 1 mM at pH= 7.5 - NaCl 2 mM;  $l = 1 \text{ cm}$ ;  $T = 298 \text{ K}$ ;  $\lambda_{\text{exc}} = 295 \text{ nm}$ ;  $\lambda_{\text{em}} = 350 \text{ nm}$ ;  $\nu_0 = 10 \text{ MHz}$ ; acquisition time: 600 s. The inset shows the Stern-Volmer plot obtained from the TCSPC intensity data (colours as in the main graph).

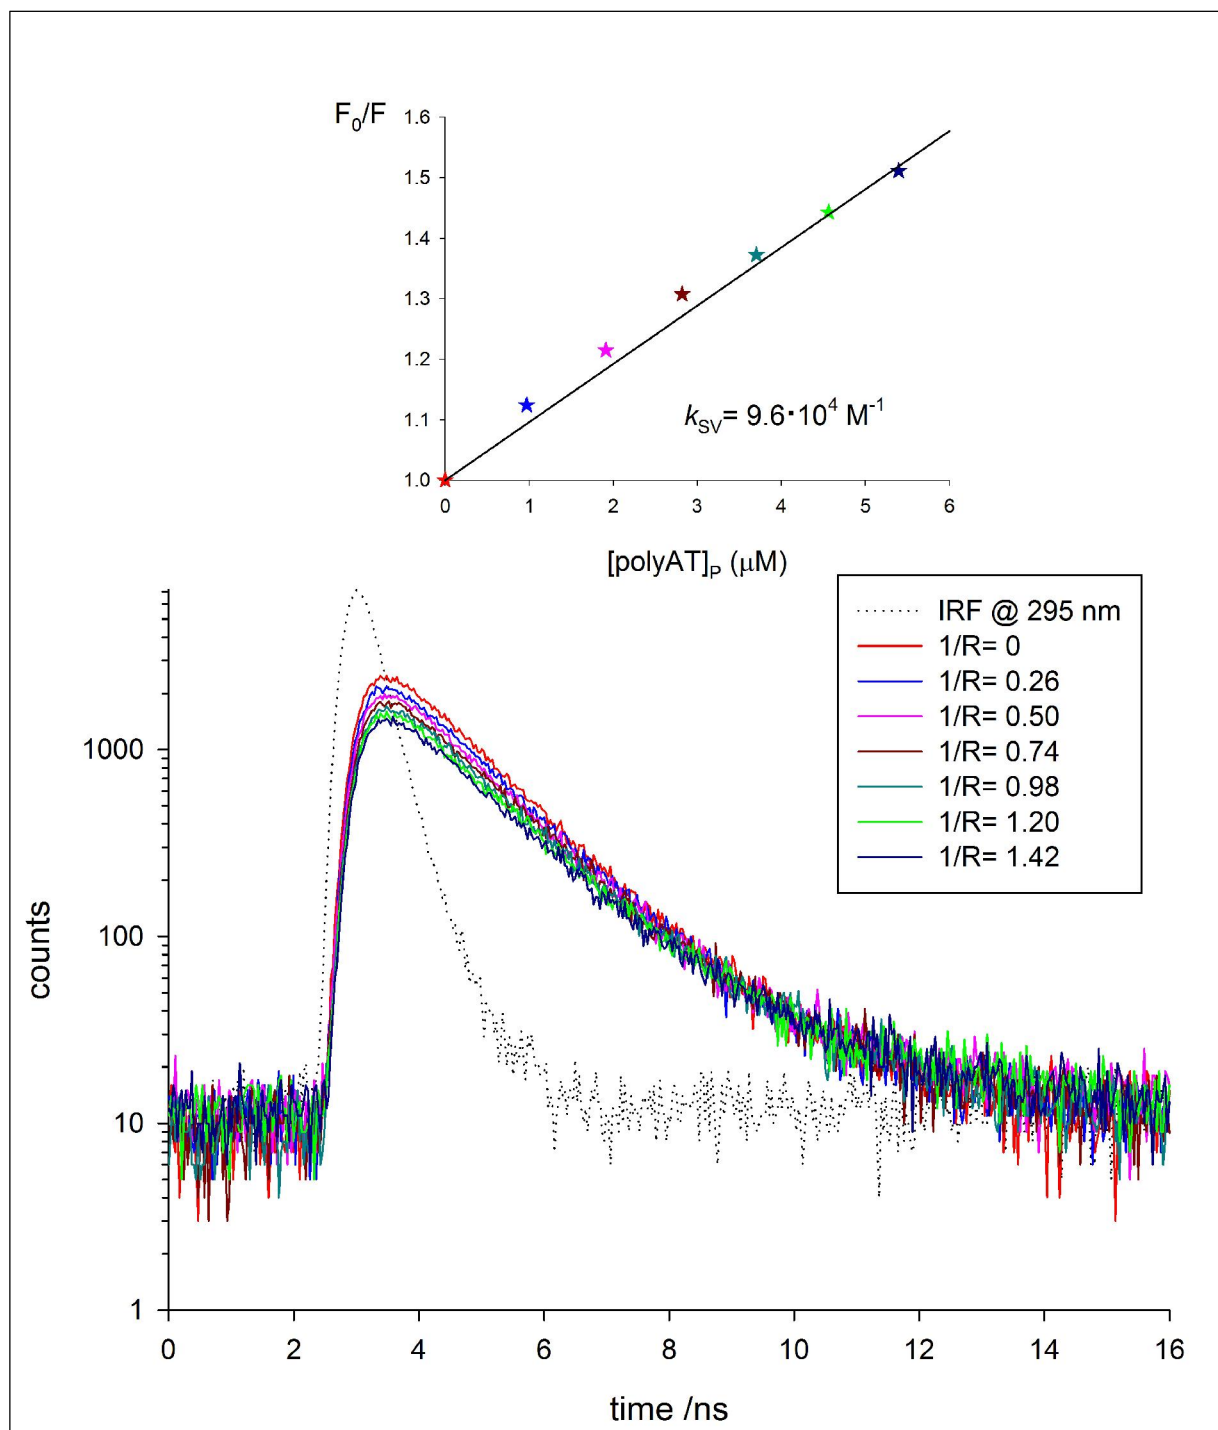

**Fig. S9** Fluorescence lifetime measurements (TCSPC) for  $\text{Cd(terpy)Cl}_2$  solution titrated with polyAT.  $R = [\text{Cd(terpy)Cl}_2]/[\text{polyAT}]_p$ ;  $[\text{Cd(terpy)Cl}_2] = 3.8 \mu\text{M}$  in Tris 1 mM at pH= 7.5 - NaCl 2 mM;  $l = 1 \text{ cm}$ ;  $T = 298 \text{ K}$ ;  $\lambda_{\text{exc}} = 295 \text{ nm}$ ;  $\lambda_{\text{em}} = 350 \text{ nm}$ ;  $\nu_0 = 10 \text{ MHz}$ ; acquisition time: 600 s. The inset shows the Stern-Volmer plot obtained from the TCSPC intensity data (colours as in the main graph).

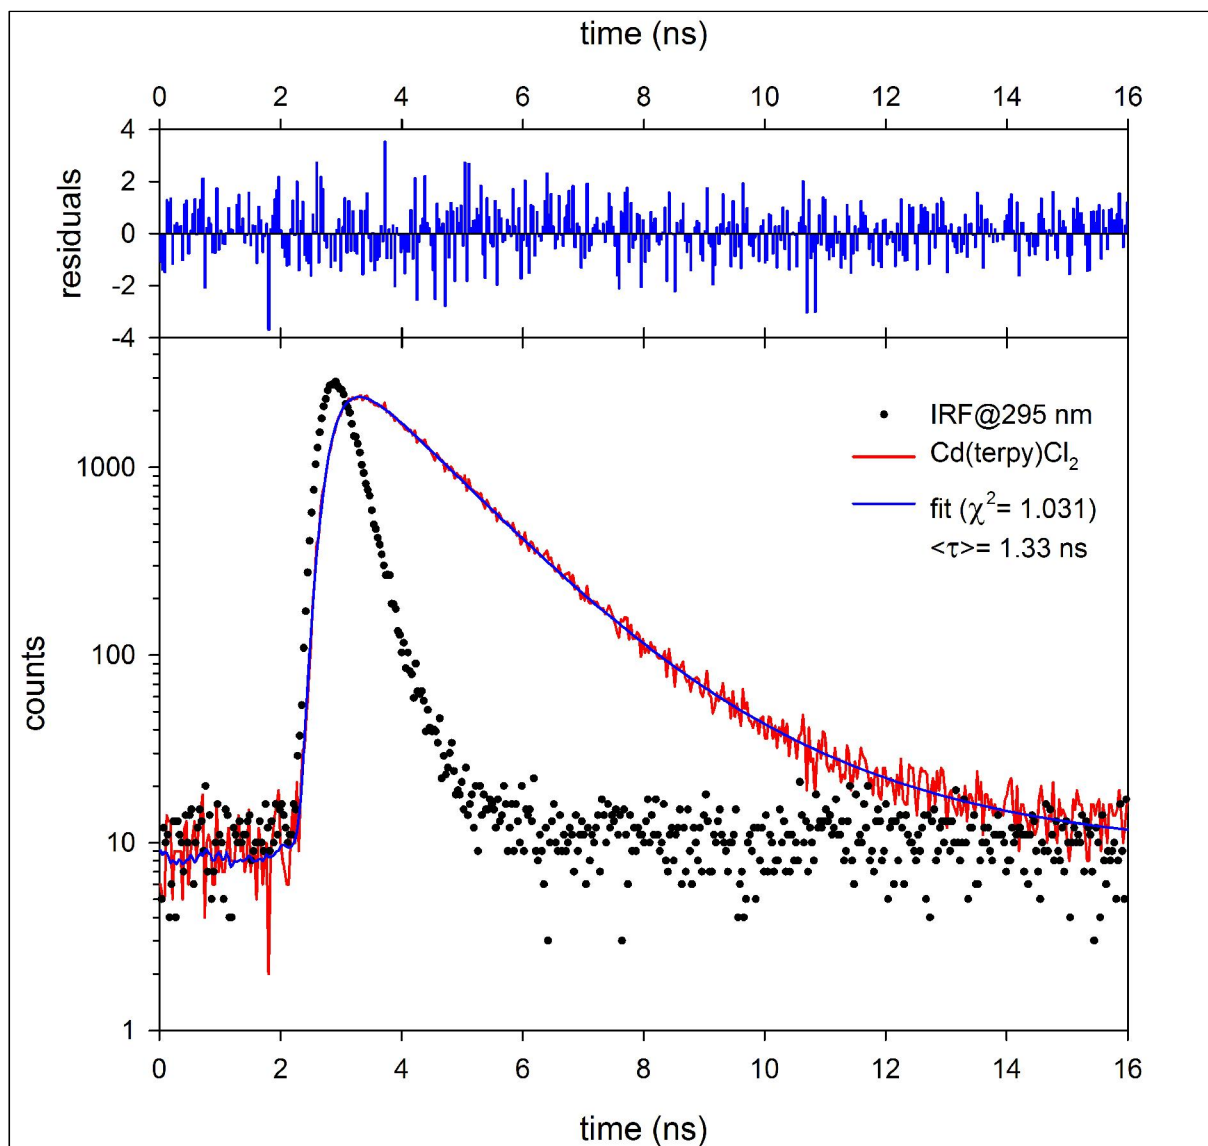

**Fig. S10** Fluorescence lifetime measurements (TCSPC) for Cd(terpy)Cl<sub>2</sub> solution.

[Cd(terpy)Cl<sub>2</sub>] = 4.3 μM in Tris 1 mM at pH = 7.5 - NaCl 2 mM; l = 1 cm; T = 298 K; λ<sub>exc</sub> = 295 nm; λ<sub>em</sub> = 350 nm; ν<sub>0</sub> = 10 MHz; acquisition time: 600 s.

The blue line in the main graph is the best fit according to a reconvolution equation between the IRF (dots) and the experimental decay (red line)

$$I(t) = \int_{-\infty}^t IRF(t') \sum_{i=1}^n A_i e^{-\frac{t-t'}{\tau_i}} dt'$$

The residuals are presented in the upper panel.

**S.8. Supplementary data of QM/MM calculations**

**Table S4.** DFT energy of the higher layer and extrapolated QM/MM energy (in Hartree) of the intercalation complexes of **1** with [dodeca(dA-dT)]<sub>2</sub> and [dodeca(dG-dC)]<sub>2</sub>, and of **2** with [dodeca(dA-dT)]<sub>2</sub>.

| Model system                           | DFT Energy     | QM/MM Energy   |
|----------------------------------------|----------------|----------------|
| <b>1</b> /[dodeca(dA-dT)] <sub>2</sub> | -2662.03620824 | -2664.93283717 |
| <b>1</b> /[dodeca(dG-dC)] <sub>2</sub> | -2694.1640888  | -2697.95923012 |
| <b>2</b> /[dodeca(dA-dT)] <sub>2</sub> | -2953.16053253 | -2956.93816948 |

## References

1. G. Morgan and F.H. Burstall, *J. Chem. Soc.*, 1937, 1649.
2. D.E.C. Corbridge and E.G. Cox, *J. Chem. Soc.*, 1956, 594.
3. R. Hogg and R.J. Wilkins, *J. Chem. Soc.*, 1962, 341.
4. R. Cortés, M.I. Arriortua, T. Rojo, X. Solans, C. Miravittles and D. Beltran, *Acta Cryst.*, 1985, **C41**, 1733.
5. K. Burger, F.E. Wagner, A. Vértes, E. Bencze, J. Mink, I. Labádi and Z.S. Nemes-Vetéssy, *J. Phys. Chem. Solids*, 2001, **62**, 2059.
6. J.E. Douglas and C.J. Wilkins, *Inorg. Chim. Acta*, 1969, **3**, 635.
7. R.J.H. Clark and C.S. Williams, *Inorg. Chem.*, 1965, **4**, 350.
8. A.B.P. Lever and E. Mantovani, *Can. J. Chem.*, 1973, **51**, 1567.
9. K.H. Schmidt and A. Müller, *Inorg. Chem.*, 1975, **14**, 2183.
10. U.S. Schubert, C. Eschbaumer, Q. An and T. Salditt, *J. Incl. Phenom.*, 1999, **35**, 35.
11. M. Chipper, M.A.R. Meier, J.M. Kranenburg and U.S. Schubert, *Macromol. Chem. Phys.*, 2007, **208**, 679.
12. R.P. Thummel and Y. Jahng, *J. Org. Chem.*, 1985, **50**, 2407.
13. P. McPhie, *Methods Enzymol.*, 1971, **22**, 23.
14. M.S. Ibrahim, *Anal. Chim. Acta*, 2001, **443**, 63.
